# Supplementary material for: Involvement of the hypothalamus–raphe–spinal defecation center axis in stress-induced defecation in rats
Source: Research Square preprint supplement (doi:10.21203/rs.3.rs-7144621/v1), 2025-09-11
Supplement: Supplementary file 1 [file 59dfb171dd318303aeeb581c.xlsx]

## Sheet: Figure 1
G)
	N
Control	4	0.5
Stress	4	0.5
Total	8	1
Parameter	% of c-Fos expression in EGFP-labeled cells
Mann Whitney test
P value	0.0286
Exact or approximate P value?	Exact
P value summary	*
Significantly different (P < 0.05)?	Yes
One- or two-tailed P value?	Two-tailed
Sum of ranks in Control, Stress	10 , 26
Mann-Whitney U	0
Difference between medians
Median of Control	4.045, n=4
Median of Stress	24.29, n=4
Difference: Actual	20.25
Difference: Hodges-Lehmann	20.18

## Sheet: Figure 2
F)
	N
×	31	0.72093
▲	8	0.186047
●	4	0.0930233
Total	43	1
Parameter	Propulsive contractions of colorectum
Two-way RM ANOVA	Matching: Across row
Assume sphericity?	Yes
Alpha	0.05
Source of Variation	% of total variation	P value	P value summary	Significant?
Row Factor x Time	37.48	<0.0001	****	Yes
Row Factor	38.52	<0.0001	****	Yes
Time	48.38	<0.0001	****	Yes
Subject	5.259	0.3581	ns	No
ANOVA table	SS	DF	MS	F (DFn, DFd)	P value
Row Factor x Time	2537	2	1268	F (2, 40) = 160.0	P<0.0001
Row Factor	2607	2	1304	F (2, 40) = 146.5	P<0.0001
Time	3275	1	3275	F (1, 40) = 413.1	P<0.0001
Subject	355.9	40	8.898	F (40, 40) = 1.123	P=0.3581
Residual	317	40	7.926
Difference between column means
Mean of Baseline	0.703
Mean of After (S)-AMPA injection	17.92
Difference between means	-17.22
SE of difference	0.847
95% CI of difference	-18.93 to -15.50
Data summary
Number of columns (Time)	2
Number of rows (Row Factor)	3
Number of subjects (Subject)	43
Number of missing values	0
Number of families	5
Number of comparisons per row family	1
Number of comparisons per column family	3
Alpha	0.05
Bonferroni's multiple comparisons test	Predicted (LS) mean diff.	95.00% CI of diff.	Below threshold?	Summary	Adjusted P Value
×
Baseline vs. After (S)-AMPA injection	-0.6452	-2.090 to 0.8001	No	ns	0.3724
▲
Baseline vs. After (S)-AMPA injection	-15.5	-18.35 to -12.65	Yes	****	<0.0001
●
Baseline vs. After (S)-AMPA injection	-35.5	-39.52 to -31.48	Yes	****	<0.0001
Baseline
× vs. ▲	-1.141	-3.954 to 1.671	No	ns	0.9724
× vs. ●	0.4839	-3.284 to 4.252	No	ns	>0.9999
▲ vs. ●	1.625	-2.718 to 5.968	No	ns	>0.9999
After (S)-AMPA injection
× vs. ▲	-16	-18.81 to -13.18	Yes	****	<0.0001
× vs. ●	-34.37	-38.14 to -30.60	Yes	****	<0.0001
▲ vs. ●	-18.38	-22.72 to -14.03	Yes	****	<0.0001
Test details	Predicted (LS) mean 1	Predicted (LS) mean 2	Predicted (LS) mean diff.	SE of diff.	N1	N2	t	DF
×
Baseline vs. After (S)-AMPA injection	0.4839	1.129	-0.6452	0.7151	31	31	0.9022	40
▲
Baseline vs. After (S)-AMPA injection	1.625	17.13	-15.5	1.408	8	8	11.01	40
●
Baseline vs. After (S)-AMPA injection	0	35.5	-35.5	1.991	4	4	17.83	40
Baseline
× vs. ▲	0.4839	1.625	-1.141	1.15	31	8	0.9921	80
× vs. ●	0.4839	0	0.4839	1.541	31	4	0.314	80
▲ vs. ●	1.625	0	1.625	1.776	8	4	0.9149	80
After (S)-AMPA injection
× vs. ▲	1.129	17.13	-16	1.15	31	8	13.91	80
× vs. ●	1.129	35.5	-34.37	1.541	31	4	22.31	80
▲ vs. ●	17.13	35.5	-18.38	1.776	8	4	10.35	80
G)
	N
×	31	0.72093
▲	8	0.186047
●	4	0.0930233
Total	43	1
Parameter	MAP
Two-way RM ANOVA	Matching: Across row
Assume sphericity?	Yes
Alpha	0.05
Source of Variation	% of total variation	P value	P value summary	Significant?
Row Factor x Time	1.879	0.0429	*	Yes
Row Factor	4.679	0.0382	*	Yes
Time	37.62	<0.0001	****	Yes
Subject	26.38	0.0034	**	Yes
ANOVA table	SS	DF	MS	F (DFn, DFd)	P value
Row Factor x Time	363.7	2	181.8	F (2, 40) = 3.411	P=0.0429
Row Factor	905.6	2	452.8	F (2, 40) = 3.547	P=0.0382
Time	7283	1	7283	F (1, 40) = 136.6	P<0.0001
Subject	5106	40	127.6	F (40, 40) = 2.395	P=0.0034
Residual	2132	40	53.3
Difference between column means
Mean of Baseline	75.13
Mean of After (S)-AMPA injection	100.8
Difference between means	-25.67
SE of difference	2.196
95% CI of difference	-30.11 to -21.23
Data summary
Number of columns (Time)	2
Number of rows (Row Factor)	3
Number of subjects (Subject)	43
Number of missing values	0
Number of families	5
Number of comparisons per row family	1
Number of comparisons per column family	3
Alpha	0.05
Bonferroni's multiple comparisons test	Predicted (LS) mean diff.	95.00% CI of diff.	Below threshold?	Summary	Adjusted P Value
×
Baseline vs. After (S)-AMPA injection	-19.94	-23.69 to -16.19	Yes	****	<0.0001
▲
Baseline vs. After (S)-AMPA injection	-29.88	-37.26 to -22.50	Yes	****	<0.0001
●
Baseline vs. After (S)-AMPA injection	-27.2	-37.64 to -16.77	Yes	****	<0.0001
Baseline
× vs. ▲	-2.292	-11.52 to 6.932	No	ns	>0.9999
× vs. ●	-3.547	-15.90 to 8.811	No	ns	>0.9999
▲ vs. ●	-1.254	-15.50 to 12.99	No	ns	>0.9999
After (S)-AMPA injection
× vs. ▲	-12.23	-21.46 to -3.009	Yes	**	0.0052
× vs. ●	-10.81	-23.17 to 1.547	No	ns	0.1064
▲ vs. ●	1.421	-12.82 to 15.67	No	ns	>0.9999
Test details	Predicted (LS) mean 1	Predicted (LS) mean 2	Predicted (LS) mean diff.	SE of diff.	N1	N2	t	DF
×
Baseline vs. After (S)-AMPA injection	73.19	93.12	-19.94	1.854	31	31	10.75	40
▲
Baseline vs. After (S)-AMPA injection	75.48	105.4	-29.88	3.65	8	8	8.185	40
●
Baseline vs. After (S)-AMPA injection	76.73	103.9	-27.2	5.163	4	4	5.269	40
Baseline
× vs. ▲	73.19	75.48	-2.292	3.772	31	8	0.6077	80
× vs. ●	73.19	76.73	-3.547	5.053	31	4	0.7018	80
▲ vs. ●	75.48	76.73	-1.254	5.825	8	4	0.2153	80
After (S)-AMPA injection
× vs. ▲	93.12	105.4	-12.23	3.772	31	8	3.243	80
× vs. ●	93.12	103.9	-10.81	5.053	31	4	2.139	80
▲ vs. ●	105.4	103.9	1.421	5.825	8	4	0.244	80
H)
	N
×	31	0.72093
▲	8	0.186047
●	4	0.0930233
Total	43	1
Parameter	HR
Two-way RM ANOVA	Matching: Across row
Assume sphericity?	Yes
Alpha	0.05
Source of Variation	% of total variation	P value	P value summary	Significant?
Row Factor x Time	1.008	0.1713	ns	No
Row Factor	2.474	0.3135	ns	No
Time	27.51	<0.0001	****	Yes
Subject	41.44	<0.0001	****	Yes
ANOVA table	SS	DF	MS	F (DFn, DFd)
Row Factor x Time	2627	2	1314	F (2, 40) = 1.844
Row Factor	6448	2	3224	F (2, 40) = 1.194
Time	71701	1	71701	F (1, 40) = 100.7
Subject	107987	40	2700	F (40, 40) = 3.790
Residual	28491	40	712.3
Difference between column means
Mean of Baseline	381.7
Mean of After (S)-AMPA injection	462.2
Difference between means	-80.55
SE of difference	8.029
95% CI of difference	-96.78 to -64.33
Data summary
Number of columns (Time)	2
Number of rows (Row Factor)	3
Number of subjects (Subject)	43
Number of missing values	0
Number of families	5
Number of comparisons per row family	1
Number of comparisons per column family	3
Alpha	0.05
Bonferroni's multiple comparisons test	Predicted (LS) mean diff.	95.00% CI of diff.	Below threshold?	Summary	Adjusted P Value
×
Baseline vs. After (S)-AMPA injection	-71.23	-84.94 to -57.53	Yes	****	<0.0001
▲
Baseline vs. After (S)-AMPA injection	-63.9	-90.87 to -36.93	Yes	****	<0.0001
●
Baseline vs. After (S)-AMPA injection	-106.5	-144.7 to -68.39	Yes	****	<0.0001
Baseline
× vs. ▲	-8.272	-48.32 to 31.78	No	ns	>0.9999
× vs. ●	-12.48	-66.14 to 41.18	No	ns	>0.9999
▲ vs. ●	-4.206	-66.06 to 57.64	No	ns	>0.9999
After (S)-AMPA injection
× vs. ▲	-0.9382	-40.99 to 39.11	No	ns	>0.9999
× vs. ●	-47.77	-101.4 to 5.889	No	ns	0.0973
▲ vs. ●	-46.83	-108.7 to 15.02	No	ns	0.2033
Test details	Predicted (LS) mean 1	Predicted (LS) mean 2	Predicted (LS) mean diff.	SE of diff.	N1	N2	t	DF
×
Baseline vs. After (S)-AMPA injection	374.8	446	-71.23	6.779	31	31	10.51	40
▲
Baseline vs. After (S)-AMPA injection	383	446.9	-63.9	13.34	8	8	4.789	40
●
Baseline vs. After (S)-AMPA injection	387.2	493.8	-106.5	18.87	4	4	5.645	40
Baseline
× vs. ▲	374.8	383	-8.272	16.38	31	8	0.505	80
× vs. ●	374.8	387.2	-12.48	21.94	31	4	0.5686	80
▲ vs. ●	383	387.2	-4.206	25.29	8	4	0.1663	80
After (S)-AMPA injection
× vs. ▲	446	446.9	-0.9382	16.38	31	8	0.05728	80
× vs. ●	446	493.8	-47.77	21.94	31	4	2.177	80
▲ vs. ●	446.9	493.8	-46.83	25.29	8	4	1.852	80

## Sheet: Figure 3
E)
	N
Saline	5	0.416667
Ketanserin+Dolasetron	7	0.583333
Total	12	1
Parameter	Propulsive contractions
Mann Whitney test
P value	0.0013
Exact or approximate P value?	Exact
P value summary	**
Significantly different (P < 0.05)?	Yes
One- or two-tailed P value?	Two-tailed
Sum of ranks in Saline, Ketanserin+Dolasetron	50 , 28
Mann-Whitney U	0
Difference between medians
Median of Saline	15.00, n=5
Median of Ketanserin+Dolasetron	0.000, n=7
Difference: Actual	-15
Difference: Hodges-Lehmann	-15
J)
	N
?	5	0.5
?	5	0.5
Total	10	1
Parameter	Propulsive contractions
Mann Whitney test
P value	0.0079
Exact or approximate P value?	Exact
P value summary	**
Significantly different (P < 0.05)?	Yes
One- or two-tailed P value?	Two-tailed
Sum of ranks in Control, Pelvic N cut	40 , 15
Mann-Whitney U	0
Difference between medians
Median of Control	10.00, n=5
Median of Pelvic N cut	0.000, n=5
Difference: Actual	-10
Difference: Hodges-Lehmann	-10

## Sheet: Figure 4
G)
	N
Vehicle	4	0.235294
L-368,899	7	0.411765
AP5/CNQX	6	0.352941
Total	17	1
Parameter	Propulsive contractions /5 min
Kruskal-Wallis test
P value	0.0065
Exact or approximate P value?	Exact
P value summary	**
Do the medians vary signif. (P < 0.05)?	Yes
Number of groups	3
Kruskal-Wallis statistic	8.554
Data summary
Number of treatments (columns)	3
Number of values (total)	17
Number of families	1
Number of comparisons per family	2
Alpha	0.05
Dunn's multiple comparisons test	Mean rank diff.	Significant?	Summary	Adjusted P Value	A-?
Vehicle vs. L-368,899	8.982	Yes	**	0.0087	B	L-368,899
Vehicle vs. AP5/CNQX	4.042	No	ns	0.4261	C	AP5/CNQX
Test details	Mean rank 1	Mean rank 2	Mean rank diff.	n1	n2	Z
Vehicle vs. L-368,899	14.13	5.143	8.982	4	7	2.85
Vehicle vs. AP5/CNQX	14.13	10.08	4.042	4	6	1.245

## Sheet: Figure 5
L)
	N
mCherry	7	0.583333
hM4Di-mCherry	5	0.416667
Total	12	1
Parameter	Propulsive contractions /20 min
Mann Whitney test
P value	0.0025
Exact or approximate P value?	Exact
P value summary	**
Significantly different (P < 0.05)?	Yes
One- or two-tailed P value?	Two-tailed
Sum of ranks in mCherry, hM4Di-mCherry	63 , 15
Mann-Whitney U	0
Difference between medians
Median of mCherry	19.00, n=7
Median of hM4Di-mCherry	8.000, n=5
Difference: Actual	-11
Difference: Hodges-Lehmann	-12
M)
	N
mCherry	7	0.583333
hM4Di-mCherry	5	0.416667
Total	12	1
Parameter	ΔMAP
Mann Whitney test
P value	0.0012
Exact or approximate P value?	Exact
P value summary	**
Significantly different (P < 0.05)?	Yes
One- or two-tailed P value?	Two-tailed
Sum of ranks in mCherry, hM4Di-mCherry	70 , 21
Mann-Whitney U	0
Difference between medians
Median of mCherry	28.20, n=7
Median of hM4Di-mCherry	15.10, n=6
Difference: Actual	-13.1
Difference: Hodges-Lehmann	-13.34
N)
	N
mCherry	7	0.583333
hM4Di-mCherry	5	0.416667
Total	12	1
Parameter	ΔHR
Mann Whitney test
P value	0.0221
Exact or approximate P value?	Exact
P value summary	*
Significantly different (P < 0.05)?	Yes
One- or two-tailed P value?	Two-tailed
Sum of ranks in mCherry, hM4Di-mCherry	65 , 26
Mann-Whitney U	5
Difference between medians
Median of mCherry	114.8, n=7
Median of hM4Di-mCherry	76.40, n=6
Difference: Actual	-38.37
Difference: Hodges-Lehmann	-40.47
P)
	N
mCherry	12	0.5
hM4Di-mCherry	12	0.5
Total	24	1
Parameter	Fecal pellets /1hour
Wilcoxon matched-pairs signed rank test
P value	0.3223
Exact or approximate P value?	Exact
P value summary	ns
Significantly different (P < 0.05)?	No
One- or two-tailed P value?	Two-tailed
Sum of positive, negative ranks	16.50 , -38.50
Sum of signed ranks (W)	-22
Number of pairs	12
Number of ties (ignored)	2
Median of differences
Median	-1
How effective was the pairing?
rs (Spearman)	0.7732
P value (one tailed)	0.0022
P value summary	**
Was the pairing significantly effective?	Yes
Q)
	N
mCherry	12	0.5
hM4Di-mCherry	12	0.5
Total	24	1
Parameter	Fecal pellets /1hour
Wilcoxon matched-pairs signed rank test
P value	0.0195
Exact or approximate P value?	Exact
P value summary	*
Significantly different (P < 0.05)?	Yes
One- or two-tailed P value?	Two-tailed
Sum of positive, negative ranks	2.500 , -42.50
Sum of signed ranks (W)	-40
Number of pairs	10
Number of ties (ignored)	1
Median of differences
Median	-1.5
How effective was the pairing?
rs (Spearman)	0.312
P value (one tailed)	0.1929
P value summary	ns
Was the pairing significantly effective?	No
