# Supplementary material for: Involvement of the hypothalamus–raphe–spinal defecation center axis in stress-induced defecation in rats
Source: Research Square preprint supplement (doi:10.21203/rs.3.rs-7144621/v1), 2025-09-11
Supplement: Supplementary file 2 [file 5e158afef3458936cb7b8a7a.docx]

**Fig. S1. The raphe nucleus receives stress-driven inputs from the hypothalamus. (A to D)**

Coronal images of hypothalamic sections, indicating distances caudal to the bregma. Distribution of EGFP-positive neurons with or without c-Fos immunoreactivity in two control rats (A, B) and two stress-exposed rats (C, D).

**Fig. S2. (S)-AMPA injection into the hypothalamus enhances colorectal motility. (A and B)**

Coronal drawings of the hypothalamus aligned with the brain atlas (modified from Paxinos & Watson, 2007), showing distances caudal to the bregma. The circles represent (S)-AMPA injection sites. The adjacent numbers of each circle indicate changes in the mean arterial pressure (MAP; A) or heart rate (HR; B). The relative strength of the physiological response to (S)-AMPA injection in 43 rats is represented by the red shading intensity.
